**Title:**

Three-dimensional morphological analysis revealed the cell patterning bases for the sexual dimorphism development in the liverwort *Marchantia polymorpha*

**Short title:**

Sexual dimorphism development in the liverwort

**Corresponding authors:**

Tatsuaki Goh

Graduate School of Science and Technology, Nara Institute of Science and Technology  
8916-5 Takayama, Ikoma, Nara 630-0192, Japan  
Tel +81-743-72-5568; Email, [goh@bs.naist.jp](mailto:goh@bs.naist.jp)

Keiji Nakajima

Graduate School of Science and Technology, Nara Institute of Science and Technology  
8916-5 Takayama, Ikoma, Nara 630-0192, Japan  
Tel +81-743-72-5560; Email, [k-nakaji@bs.naist.jp](mailto:k-nakaji@bs.naist.jp)

**Subject areas:**

(1) growth and development

**With 10 color figures, 1 supplementary table, 1 supplementary figure, and 12 supplementary videos**

**Title:**

Three-dimensional morphological analysis revealed the cell patterning bases for the sexual dimorphism development in the liverwort *Marchantia polymorpha*

**Short title:**

Sexual dimorphism development in the liverwort

**Authors:**

Yihui Cui<sup>1</sup>, Tetsuya Hisanaga<sup>1,§</sup>, Tomoaki Kajiwara<sup>2</sup>, Shohei Yamaoka<sup>2</sup>, Takayuki Kohchi<sup>2</sup>,  
Tatsuaki Goh<sup>1,\*</sup>, and Keiji Nakajima<sup>1,\*</sup>

**Authors' affiliation:**

<sup>1</sup> Graduate School of Science and Technology, Nara Institute of Science and Technology,  
8916-5 Takayama, Ikoma, Nara 630-0192, Japan

<sup>2</sup> Graduate School of Biostudies, Kyoto University, Kitashirakawa Oiwake-cho, Sakyo-ku,  
Kyoto 606-8502, Japan

**Footnote:**

\*Corresponding authors, Tatsuaki Goh (goh@bs.naist.jp) and Keiji Nakajima (k-nakaji@bs.naist.jp)

§Present address, Gregor Mendel Institute, Austrian Academy of Sciences, Vienna BioCenter,  
Dr. Bohr-Gasse 3, 1030 Vienna, Austria

1 **Abstract**

2

3 In land plants, sexual dimorphism can develop in both diploid sporophytes and haploid  
4 gametophytes. While developmental processes of sexual dimorphism have been extensively  
5 studied in the sporophytic reproductive organs of model flowering plants such as stamens and  
6 carpels of *Arabidopsis thaliana*, those occurring in gametophyte generation are less well  
7 characterized due to the lack of amenable model systems. We here performed three-dimensional  
8 morphological analyses of gametophytic sexual branch differentiation in the liverwort  
9 *Marchantia polymorpha*, using high-depth confocal imaging and a computational cell  
10 segmentation technique. Our analysis revealed that specification of germline precursors initiates  
11 in a very early stage of sexual branch development where incipient branch primordia are barely  
12 recognizable in the apical notch region. Moreover, spatial distribution patterns of germline  
13 precursors differ between males and females from the initial stage of primordium development in  
14 a manner dependent on the master sexual differentiation regulator Mp*FGMYB*. In later stages,  
15 distribution patterns of germline precursors predict the sex-specific gametangia arrangement and  
16 receptacle morphologies seen in mature sexual branches. Taken together, our data suggests a  
17 tightly coupled progression of germline segregation and sexual dimorphism development in *M.*  
18 *polymorpha*.

19

20 **Keywords:** (no more than six)

21 Cell patterning, Gametophyte, Germline, Sexual dimorphism, Sexual reproduction, *Marchantia*  
22 *polymorpha*

23

## 24 **Introduction**

25

26 Sexual dimorphism is commonly observed in multicellular organisms that propagate by sexual  
27 reproduction (Barrett and Hough 2013; McPherson and Chenoweth 2012). In oogamous animals,  
28 sexual dimorphism occurs in size and motility of haploid gametes, with female and male  
29 producing large immotile eggs and small motile sperm, respectively. In addition to the gamete  
30 morphology, sexual dimorphism also develops in diploid reproductive organs, and they play  
31 important roles in supporting gamete production, fertilization, and embryo development. As in  
32 animals, multicellular plants also undergo sexual differentiation in both reproductive organs and  
33 gametes. However, as land plants develop multicellular bodies both in haploid and diploid  
34 generations called gametophyte and sporophyte, respectively, plants exhibit additional sexual  
35 dimorphism in the gametophyte generation (Coelho et al. 2018; Schmidt et al. 2015). In flowering  
36 plants where sporophyte generation is predominant in the life cycle, conspicuous sexual  
37 dimorphism develops in the floral organs such as stamens and carpels, whereas sexual  
38 differentiation in the haploid gametophytes is inconspicuous, making pollens and embryo sacs  
39 that are composed of only a few cells and develop inside the sporophytic sexual organs (Schmidt  
40 et al. 2015). Thus, to study the process and mechanisms of gametophytic sexual differentiation in  
41 plants, a good model system with a gametophyte-dominant life cycle is required.

42         The recently reviving model bryophyte *Marchantia polymorpha* has been widely used  
43 as a unique system to study gametophytic sexual reproduction and their evolution in the land plant  
44 lineage (Hisanaga et al. 2019b). The life cycle of *M. polymorpha* is dominated by the haploid  
45 gametophytic generation. The main vegetative body consists of a leaf-like organ called thallus,  
46 which bifurcates at the apical notch region located between the bases of the two lobes (Shimamura  
47 2016). *M. polymorpha* is dioicous, with its sex of its haploid gametophytes determined by the

48 presence of either V or U chromosomes, yet no distinct sexual morphologies develop during  
49 vegetative growth (Iwasaki et al. 2021; Kohchi et al. 2021; Shimamura 2016; Yamato et al. 2007).  
50 In experimental cultures, reproductive growth of *M. polymorpha* is induced by supplemental  
51 irradiation of far-red (FR) light (Inoue et al. 2019). After phase transition, a sexual branch  
52 (gametangiophore) is formed from one of the two apical notch regions in a bifurcating thallus.  
53 Gametangiophores of *M. polymorpha* exhibit clear sexual dimorphism in their receptacle (Figure  
54 1A and 1B). In the male gametangiophore (antheridiophore), receptacles exhibit a disc-like  
55 morphology with typically eight lobes per receptacle, whereas receptacles of female  
56 gametangiophores (archegoniophores) bear 9-11 finger-like rays (Shimamura 2016). In addition  
57 to the receptacle morphology, mature antheridiophores and archegoniophores exhibit clear  
58 difference in the spatial arrangement of gametangia in the receptacles (Figure 1C-1F). Male  
59 gametangia (antheridia) are embedded in the upper surface of the receptacles, whereas female  
60 gametangia (archegonia) are radially aligned beneath the receptacles. Moreover, developing  
61 gametangia are arranged in opposite orientations along the receptacle radius between males and  
62 females; more mature antheridia are located toward the center of the male receptacles, whereas  
63 more mature archegonia are located toward the periphery of female receptacles (Figure 1E and  
64 1F) (Shimamura 2016).

65         Previous studies have identified key regulators of sexual reproduction in *M. polymorpha*.  
66 Among them, MpBONOBO (MpBNB) encoding a member of the VIIIa subfamily of basic helix-  
67 loop-helix transcription factors promotes sexual branch formation and germ cell differentiation  
68 (Yamaoka et al. 2018). Mutants constitutively expressing MpBNB form sexual branches  
69 independently of FR irradiation, whereas Mpbnb knock-out mutants are unable to form sexual  
70 branches even under prolonged FR irradiation. Expression of MpBNB is transiently observed in  
71 gametangium initials that later give rise to gametangia in both males and females. *A. thaliana*

72 mutants lacking two *MpBNB* homologs are defective in generative cell specification in pollens,  
73 and this defect was rescued by *MpBNB* expressed from the *A. thaliana BNB2* promoter, indicating  
74 evolutionarily conserved functions of *BNB* in germline differentiation (Yamaoka et al. 2018).  
75 Autosomal *FEMALE GAMETOPHYTE MYB* (*MpFGMYB*) encoding an R2R3 MYB-type  
76 transcription factor is a key regulator of female sexual differentiation in *M. polymorpha* (Hisanaga  
77 et al. 2019a). Genetically female *Mpfgmyb* knock-out mutants exhibit a nearly complete female-  
78 to-male sexual conversion phenotype; they produce male sexual branches and sperm-containing  
79 antheridia, though sperm motility is lost presumably due to the lack of gene(s) in the V  
80 chromosome. Expression of *MpFGMYB* is suppressed in males by the *cis*-acting anti-sense long  
81 non-coding RNA gene named *SUPPRESSOR OF FEMINIZATION (SUF)* in the *MpFGMYB*  
82 locus. Loss-of-function *suf* mutant males exhibit female morphologies, though egg cells do not  
83 mature in their feminized gametangia. Expression of *SUF* is in turn silenced in females by U  
84 chromosomal *MpBPCU* encoding a member of the BASIC PENTACYSTEINE transcription  
85 factor family (Iwasaki et al. 2021). *MpBPCU* and its male gametolog *MpBPCV* are also required  
86 for phase transition. *MpFGMYB* is phylogenetically related to *A. thaliana MYB64*, *MYB98*, and  
87 *MYB119* known to regulate embryo sac and synergid cell differentiation (Kasahara et al. 2005;  
88 Rabiger and Drews 2013). Thus at least some members of the FGMYB clade appear to have roles  
89 in female gametophyte differentiation along the land plant lineage (Hisanaga et al. 2019a).

90         While *M. polymorpha* is a widely used bryophyte model and proven useful to decipher  
91 genetic mechanisms and evolution of sexual reproduction in land plants (Hisanaga et al. 2019b),  
92 detailed developmental processes of its sexual dimorphism, especially those leading to distinct  
93 sexual branch morphologies, have not been explicitly described at the cellular resolution, though  
94 cell division sequences to produce the female and male gametangia, i.e. archegonia and antheridia,  
95 have been documented for more than a century (Durand, 1908). In this study, we performed

96 detailed three-dimensional (3D) morphological analysis to reveal cell-level developmental  
97 processes underlying the sexual dimorphism development in *M. polymorpha*. Using MpBNB as a  
98 marker for germline precursors (Yamaoka et al. 2018), we visualized the spatial arrangement of  
99 germline segregation and their contribution to the sex-specific receptacle morphologies. Our  
100 study revealed that specification of germline precursors starts as early as in the stage where the  
101 sexual branch formation is barely detectable at the apical notch region. Moreover, spatiotemporal  
102 distribution patterns of germline precursors differ between male and female before the sex-  
103 specific organ morphologies become evident, and are later translated into the sex-specific  
104 gametangium arrangement and sexual branch morphologies, suggesting a link between germline  
105 positioning and sexual organ morphogenesis in *M. polymorpha*.

106

107

## 108 **Results**

109

### 110 **Germline specification and gametangiophore development initiate simultaneously in *M.*** 111 ***polymorpha***

112 To elucidate the cell-level patterning processes underlying the sexual dimorphism  
113 development in *M. polymorpha*, we performed 3D cell segmentation analyses of early-stage  
114 gametangiophore primordia. Briefly, segments containing gametangiophore primordia were  
115 excised from the apical notch region of thalli, subjected to tissue clearing by iTOMEI (Sakamoto  
116 et al. 2022), and stained with the fluorescence dye Renaissance 2200 to visualize cell walls. 3D  
117 cell wall patterns were reconstructed from Z-stack confocal images and used for cell segmentation  
118 analysis by the MorphoGraphX program (Figure 2A-2D) (Strauss et al. 2022). The primordia  
119 analyzed in this study were less than 500  $\mu\text{m}$  in diameter and yet without elongated stalks. Thus,

120 our analysis further dissected the previously defined stage 1 (< 2 mm in receptacle diameter)  
121 (Higo et al. 2016) into substages 1a through 1e (1a, <100  $\mu\text{m}$ ; 1b, 100-200  $\mu\text{m}$ ; 1c, 200-300  $\mu\text{m}$ ;  
122 1d, 300-400  $\mu\text{m}$ ; 1e, >400  $\mu\text{m}$ ). We utilized the *MpBNB-Citrine* knock-in lines to detect initiation  
123 of gametangia primordia (Yamaoka et al. 2018). Consistent with the previous report (Yamaoka et  
124 al. 2018), expression of *MpBNB-Citrine* was confined to the gametangium initials and their  
125 daughter cells (Figure 2G). Because these cells are segregated to sperm-forming antheridia and  
126 egg-forming archegonia, we here call the *MpBNB-Citrine*-expressing cells germline precursors  
127 (colored pink in segmented images) (Lanfear 2018; Schmidt et al. 2015). Cells derived from the  
128 germline precursors could be easily identified by their characteristic cellular patterns forming  
129 gametangium primordia (colored purple in segmented images). Thus, combination of the *MpBNB*  
130 marker and cellular patterns allowed us to identify cell lineages leading to gametangium formation  
131 (Figure 2E-2G).

132 In males, visible antheridiophore primordia emerged as a slightly convex protrusion in  
133 the apical notch region typically two days after the onset of the FR irradiation, and a few *MpBNB*-  
134 expressing germline precursors were scattered over the primordium surface (Figure 3A and 4,  
135 stage 1a; Supplementary video 1). In later stages, more germline precursors emerged on the  
136 expanded primordia (Figure 4, stage 1b). In females, although the *MpBNB*-expressing germline  
137 precursors emerged in the incipient receptacle primordia as in males and in a slightly later timing  
138 (3 days after the onset of the FR irradiation), their number remained few in early stages (Figure  
139 3B and 5, stages 1a and 1b; Supplementary video 2). Together, our observation confirmed the  
140 specific expression of *MpBNB-Citrine* in germline precursors (Yamaoka et al. 2018), and further  
141 revealed previously undescribed difference in the distribution patterns of germline precursors  
142 between male and female.

143



144 **Morphology of gametangiophore primordia and germline positioning differentiate between**  
145 **males and females early in the primordium development**

146 While both male and female gametangiophore primordia initially had a similar dome-like  
147 morphology, they differentiate as the primordia grew larger in later stages. The overall  
148 morphology of male primordia became flattened (Figure 4, stage 1d; Supplementary video 3),  
149 whereas female primordia remained dome-shaped (Figure 5, stage 1d; Supplementary video 4).  
150 Difference in the number and distribution patterns of germline precursors also became more  
151 evident. In males, germline precursors and their progenies were broadly distributed over the upper  
152 surface of antheridiophore primordia (Figure 4 stages 1c and 1d; Supplementary video 3). This  
153 scattered distribution pattern was maintained as the primordia expand, while new antheridial  
154 initials continuously emerged at the peripheral region. Lobe-like protrusions emerged around  
155 disc-shaped primordium periphery (Figure 4, stage 1d). In later stages, germline precursors and  
156 their progenies were distributed around the incipient peripheral lobes of receptacle primordia,  
157 whereas more mature antheridial primordia were located closer to the receptacle center (Figure 4,  
158 stage 1d; Supplementary video 3). In females, the number of germline precursors remained fewer  
159 than those in males (Figure 6G). In contrast to males that produce lobe-like protrusion at the  
160 receptacle periphery (Figure 7A; Supplementary video 7), female primordia produced  
161 indentations on the bottom side of the receptacles (Figure 5, stage 1d; Supplementary video 4),  
162 which later became the indentations separating the finger-like rays (Figure 7B and 7C;  
163 Supplementary video 8).

164 In summary, early development of male and female gametangiophore primordia predicts  
165 the mature receptacle morphologies, though the primordia of these stages are yet ~10 times  
166 smaller than mature gametangiophores. Beside the visible morphological differences, male and  
167 female primordia exhibit striking difference in the number and distribution patterns of germline

168 lineages.

169

170 **Distinct cell proliferation and elongation may underlie the sex-specific gametangiophore**  
171 **morphogenesis**

172 To elucidate the cell patterning processes that differentiate the male and female sexual  
173 morphologies in gametangiophore development, we analyzed the cell volume distribution using  
174 the 3D cell segmentation data of stage 1c gametangiophore primordia, where the distinct sexual  
175 morphologies became first recognizable (Figure 6A-6F). In male primordia, domains filled with  
176 small cells were found on the bottom surface and around the edge region (blue cells in Figure 6B  
177 and 6C; Supplementary video 5), whereas in the female primordium, small cells were  
178 preferentially distributed on the top surface and at the indentations (Figure 6E and 6F;  
179 Supplementary video 6). These observations suggest the existence of spatially distinct regulation  
180 of cell proliferation and/or elongation between male and female primordia at this stage.

181

182 **MpFGMYB regulates female sexual differentiation from initial stage of gametangiophore**  
183 **development**

184 Loss-of-function *Mpfgmyb* mutant females are masculinization in most sexual differentiation  
185 steps including gametangiophore morphogenesis, gametangium formation, and gamete  
186 differentiation (Hisanaga et al. 2019a). To investigate when and where *MpFGMYB* functions  
187 during female sexual differentiation, we first carried out detailed 3D expression analyses of the  
188 transcriptional *MpFGMYB* reporter in a wild-type female background, as well as the *MpBNB*-  
189 Citrine marker in the *Mpfgmyb* mutant background (Supplementary Figure S1). Consistent with  
190 the previous report (Hisanaga et al. 2019a), expression of *MpFGMYB* was undetectable in the  
191 apical notch region of vegetative thalli (Figure 8A). After induction of reproductive growth by

192 FR irradiation, the Mp*FGMYB* reporter started to express in archegoniophore primordia (Figure  
193 8B; Supplementary video 9). Presumptive germline precursors that are destined to archegonia and  
194 protruded from the primordium surface exhibited stronger expression of the Mp*FGMYB* reporter  
195 in the following stage (Figure 8C; Supplementary video 10).

196 Gametangiophore morphogenesis and germline precursor positioning of Mp*fgmyb*  
197 mutants closely followed those of wild-type males. Multiple MpBNB-expressing gametangium  
198 initials were found on the slightly convex surface of incipient gametangiophore primordia  
199 emerged from the apical notch region after FR irradiation (Figure 9, stage 1a; Supplementary  
200 video 11). In later stages, gametangiophore primordia expanded to have a dome-like morphology  
201 and the number of germline precursors increased (Figure 9, stage 1b). As the receptacle primordia  
202 grew larger, they gradually became flattened as in wild-type males. Developing gametangia  
203 (Figure 9, purple) were observed on the upper surface of receptacle primordia with more mature  
204 gametangia located closer to the center of the receptacle primordia as in wild-type males (compare  
205 Figure 4 and 9, stage 1d). Thus, Mp*fgmyb* is masculinized from the earliest observable stage of  
206 sexual dimorphism development, supporting the notion that Mp*FGMYB* is a master regulator of  
207 female sexual differentiation in *M. polymorpha*.

208

209

## 210 **Discussion**

211

### 212 **Growth phase transition and germline differentiation are coupled in *M. polymorpha***

213 Sexual dimorphism of mature gametangiophores of *M. polymorpha* has been documented since  
214 the mid-15th century (reviewed by Bowman 2016), yet how its characteristic sexual branch  
215 dimorphism is established has not been explicitly described at cellular resolution. In this study,

216 we performed cell-level 3D-morphological analysis using the MorphoGraphX (Strauss et al.  
217 2022; Vijayan et al. 2021) to address this question. Our data revealed strong correlation between  
218 spatial distribution patterns of germline precursors and morphogenic processes of  
219 gametangiophore receptacles. In both males and females, MpBNB-expressing germline  
220 precursors first emerged as early as in the stage where incipient gametangiophore primordium  
221 could be barely recognized as a slight protrusion in the apical notch region. More germline  
222 precursors repeatedly emerged as the gametangiophore primordia expand, but with different  
223 frequencies and spatial patterns between males and females. These observations indicate that  
224 sexual morphogenesis of gametangiophore and specification of germline precursors occur in  
225 parallel. This is in good contrast with the reproductive development of sporophyte-dominant  
226 flowering plants, where conspicuous sexual morphogenesis first takes place in sporophytic floral  
227 organs (stamens and carpels), followed by meiocytes differentiation (Barrett and Hough 2013).  
228 Previous studies indicated that specification of male and female gametes requires sporophyte-  
229 derived factors in flowering plants (Olmedo-Monfil et al. 2010; Tidy et al. 2022; Zhao et al. 2001;  
230 Zhao et al. 2017). Thus, sporophytic sexual differentiation is a prerequisite for precise  
231 specification of germline precursors. By contrast, in gametophyte-dominant *M. polymorpha*,  
232 differentiation of sexual morphologies and germline specification appear to be spatiotemporally  
233 coupled to each other.

234         Then, how is the progression of germline specification and sexual branch formation  
235 coordinately regulated? Our data suggest that MpBNB plays an important role. Loss-of-function  
236 *Mpbnb* mutants are unable to initiate sexual branch formation (Yamaoka et al. 2018), though  
237 MpBNB-Citrine reporter was found to express transiently in germline precursors, not in entire  
238 primordia (Yamaoka et al. 2018). Our detailed 3D visualization confirmed the germline precursor-  
239 specific expression of MpBNB throughout the course of early gametangiophore development,

240 suggesting that *MpBNB* primarily acts in germline differentiation, which in turn promotes sexual  
241 branch formation by unknown mechanisms. In this scenario, sexual morphogenesis follows  
242 germline differentiation in *M. polymorpha*, an order opposite to that in flowering plants, but  
243 analogous to early germline segregation and sexual organ differentiation in animal development  
244 (Lanfear 2018).

245

#### 246 **Different germline positioning may underlie sex-specific gametangiophore morphologies**

247 Our 3D morphological analysis revealed that male and female gametangiophore primordia  
248 initially exhibit a similar dome-like morphology. At this stage, however, spatial distribution  
249 patterns of *MpBNB*-expressing germline initials (which later develop into gametangia) are already  
250 different between males and females. This difference is even apparent in the initial stage where  
251 gametangiophore primordia can be barely recognized as a slight protrusion in the apical notch  
252 region. In males, many germline precursors emerge on the convex surface of incipient primordia  
253 and their number increases as the primordia expand, whereas in females significantly fewer  
254 germline precursors are initially formed, and their sparse distribution pattern is maintained in later  
255 stages. Importantly, spatial distribution patterns of germline precursors correlated well with the  
256 sexual morphologies of male and female gametangiophores. In males, germline precursors are  
257 scattered over the upper surface of antheridiophore primordia and develop into antheridia on the  
258 top surface of disc-shaped antheridiophore receptacles. In females, germline precursors are  
259 localized along the peripheral region of archegoniophore primordia with regular intervals, and  
260 eventually develop into mature archegonia. Cells occupying the space between the two  
261 neighboring germline precursor clusters proliferate to form protrusions, which later develops into  
262 the finger-like rays seen in mature archegoniophores. Thus, germline precursor positioning  
263 appears to play an important role in establishing the sexual dimorphism of gametangiophore

264 receptacles of *M. polymorpha* (Figure 10).

265

266 **MpFGMYB promotes female sexual differentiation from the initial stage of reproductive**  
267 **development**

268 MpFGMYB encoding a Myb-type transcription factor has been identified as a key regulator of  
269 female sexual differentiation in *M. polymorpha* (Hisanaga et al. 2019a). When MpFGMYB is  
270 knocked out in females, their sexual morphologies were masculinized in multiple scales,  
271 including gametangiophore morphologies, gametangium differentiation, and gamete formation.  
272 This previous study indicated that the default sexual differentiation program of *M. polymorpha* is  
273 for males, and that MpFGMYB "overwrites" it with a female sexual differentiation program.  
274 While the previous study revealed the expression of the MpFGMYB reporter in the apical notch  
275 region of thalli after FR-irradiation, it has been unknown from what stage of reproductive  
276 development MpFGMYB functions to promote female sexual morphogenesis.

277 Our 3D expression and phenotypic analyses clearly indicated that MpFGMYB is  
278 required from the early stage of sexual dimorphism development. In genetically female *Mpfgmyb*  
279 mutants, the MpBNB-expressing germline precursors were scattered over early gametangiophore  
280 primordia as seen in wild-type males. The MpFGMYB reporter was expressed in several layers  
281 over the entire surface of archegoniophore primordia in wild-type females, with a few protruding  
282 cells destined to archegonia exhibiting significantly higher expression. These observations  
283 suggest that MpFGMYB functions to regulate germline positioning at the initial stage of  
284 archegoniophore development, in addition to gametangia morphogenesis that takes place in more  
285 later stages. These results are consistent with the previously proposed role of MpFGMYB as a  
286 master regulator of female sexual differentiation in *M. polymorpha* (Hisanaga et al. 2019a).

287

288

## 289 **Materials and Methods**

290

### 291 **Plant materials and growth condition**

292 Wild-type female and male strains of *M. polymorpha* used in this study were Takaragaike-2 (Tak-  
293 2) and Takaragaike-1 (Tak-1), respectively (Ishizaki et al. 2016). *Mpfgmyb* knock-out plants  
294 harboring the MpBNB-Citrine marker was generated by transforming the female *MpBNB-Citrine*  
295 knock-in plants (Yamaoka et al. 2018) with the previously described gRNA construct  
296 *pMpGE011\_MpFGMYBge01* (Hisanaga et al. 2019a). The transcriptional *MpFGMYB* reporter  
297 line was prepared by transforming the *MpFGMYBpro:H2B-mNeonGreen:MpSUF* construct  
298 describe below to the wild-type Tak-2 plants as described previously (Tsuboyama et al. 2018).

299 Plants were cultured on a half-strength Gamborg's B5 agar medium under continuous  
300 white light at 22 °C and asexually propagated through gemmae. To induce reproductive growth,  
301 gemmae pre-cultured for 10 days were transferred to vermiculite-containing pots and illuminated  
302 with continuous white light supplemented with FR as described previously (Hisanaga et al. 2019a).

303

### 304 **DNA construction**

305 *MpFGMYBpro:H2B-mNeonGreen:MpSUF* was constructed as follows using the primers listed in  
306 Supplementary Table 1. *MpFGMYB* and *MpSUF* sequences were amplified from Tak-1 genomic  
307 DNA using primer pairs of pENTR1a-AscI-MpFGMYB4kbup-F and pENTR1a-  
308 MpFGMYBPmeI-R, and MpFGMYBPmeI-F and pENTR1a-MpSUF5kbup-R, respectively. The  
309 *MpFGMYB* sequence was subcloned into an EcoRI site of pENTR1A vector (Thermo Fisher  
310 Scientific, MA) using the In-Fusion system (Takara Bio, Shiga, Japan). The resultant *MpFGMYB*  
311 plasmid was digested with PmeI and NotI, and the amplified *MpSUF* sequence was ligated into

312 the PmeI/NotI sites of MpFGMYB plasmid using the In-Fusion system to create *pENTR1a-*  
313 *MpFGMYB-MpSUF* carrying the entire sequence of the MpFGMYB/MpSUF gene locus including  
314 4-kb upstream and 5.3-kb downstream regions. Next, to replace the MpFGMYB coding sequence  
315 with a reporter sequence *H2B-mNeonGreen*, two partial sequences of *pENTR1a-MpFGMYB-*  
316 *MpSUF* were amplified using primer pairs of MpFGMYB4kbup-Cloning-F and PmeI-  
317 MpFGMYBpro-Rv, and PmeI-MpFGMYBpro-Fw and MpFGMYBEco105I-R, and combined  
318 into a single sequence by overlap extension PCR, which was then inserted into the AscI/Eco105  
319 sites of pENTR1a-MpFGMYB-MpSUF to create pENTR1a-MpFGMYBpro-PmeI-MpSUF. The  
320 coding sequence of *AtHTB1* (AT1G07790) was amplified from *pKI-GWB2 H2B* vector (provided  
321 by Dr. Kimitsune Ishizaki) using a primer pair of AtHTB1-Cloning-F-dTOPO and AtHTB1-  
322 GSGSGS-R. The coding sequence of *Arabidopsis*-codon-optimized mNeonGreen was amplified  
323 from pENTR Atco\_mNeonGreen vector (provided by Dr. Ryuichi Nishihama) using a primer pair  
324 of GSGSGS-Atco\_mNG-F and Atco\_mNG-Cloning-R. These sequences were combined into a  
325 single sequence by overlap extension PCR, and subcloned into pENTR/D-TOPO vector (Thermo  
326 Fisher Scientific). The resultant vector was used to amplify the coding sequence of *H2B-*  
327 *mNeonGreen* using a primer pair of MpFGMYBp-AtHTB1-Fw and MpFGMYBt-mNG-Rv, and  
328 the resultant sequence was ligated into the PmeI site of pENTR1a-MpFGMYBpro-PmeI-MpSUF  
329 using a SLiCE reaction (Zhang et al. 2012). The resultant entry vector was used for a  
330 recombination reaction with pMpGWB101 (Ishizaki et al. 2015) using Gateway LR clonase II  
331 Enzyme mix (Thermo Fisher Scientific) to create *pMpGWB101-*  
332 *MpFGMYBpro:mNeonGreen:MpSUF*.

333

### 334 **Histology and microscopy**

335 Gametangiophore primordia were dissected using forceps and needles under a dissecting



336 microscope and fixed with a 1% (w/v) formaldehyde (FA) solution for 1 hour followed by  
337 washing three times with PBS buffer. Samples were cleared in a decolorization solution [100 mM  
338 sodium phosphate buffer pH 8.0, 20% (w/v) caprylyl sulfobetaine, 7.5% (w/v) sodium  
339 deoxycholate] overnight. After washing in PBS, samples were stained with 0.1% (v/v)  
340 Renaissance 2200 (Renaissance Chemicals, Selby, UK; Musielak, 2015) in PBS for 10 min. After  
341 washing in PBS, samples were incubated in a series of mounting solutions [20%, 50% and 70%  
342 (w/w) iohexol in PBS] (Kurihara et al. 2015; Sakamoto et al. 2022), and observed using a Leica  
343 TCS SP8 confocal laser scanning microscope (Leica Microsystems, Wetzlar, Germany). Typically,  
344 Z-stack images were collected in 0.2-0.3  $\mu\text{m}$  increments for the depth of 70-180  $\mu\text{m}$  to construct  
345 the 3D images.

346

#### 347 **Cell segmentation analysis using MorphoGraphX**

348 Cell segmentation was performed using the MorphoGraphX (MGX) program as described  
349 previously (de Reuille et al., 2015, Vijayan, 2021). Briefly, confocal stack images of Renaissance  
350 2200-stained gametangiophore primordia were first enhanced for the image contrast using the  
351 Stack Contrast Adjustment Plugin of the ImageJ software (Čapek et al. 2006). After loading to  
352 MGX, images were blurred by a Gaussian filter with a radius of 0.8  $\mu\text{m}$  in xyz. Segmentation was  
353 carried out by the ITK morphological watershed function with the default threshold of 3000, and  
354 3D cell meshes were generated from the segmented image stacks using the Marching Cubes 3D  
355 function with a 2.5  $\mu\text{m}$  cube size. For germline precursor labeling, the cell meshes corresponding  
356 to the MpBNB-Citrine expressing cells were labeled using the parent label function of MGX.

357

358

359

360 **Acknowledgement**

361 We thank Masako Kanda for technical assistance, and Kimitsune Ishizaki and Ryuichi Nishihama  
362 for materials. YC was supported by the MEXT scholarship.

363

364 **Funding**

365 This work is supported by Grant-in-Aid for Scientific Research (S) (17H07424) from Japan  
366 Society for the Promotion of Science (JSPS) to TaK, SY and KN, and Grant-in-Aid for JSPS  
367 Fellows (17J08430) to TH.

368

369 **References**

370

371 Barrett, S.C.H. and Hough, J. (2013) Sexual dimorphism in flowering plants. *Journal of*  
372 *Experimental Botany* 64: 67-82.

373 Bowman, J.L. (2016) A brief history of *Marchantia* from Greece to genomics. *Plant Cell Physiol*  
374 57: 210-229.

375 Čapek, M., Janáček, J. and Kubínová, L. (2006) Methods for compensation of the light attenuation  
376 with depth of images captured by a confocal microscope. *Microscopy Research and*  
377 *Technique* 69: 624-635.

378 Coelho, S.M., Gueno, J., Lipinska, A.P., Cock, J.M. and Umen, J.G. (2018) UV Chromosomes  
379 and Haploid Sexual Systems. *Trends in plant science* 23: 794-807.

380 Higo, A., Niwa, M., Yamato, K.T., Yamada, L., Sawada, H., Sakamoto, T., et al. (2016)  
381 Transcriptional framework of male gametogenesis in the liverwort *Marchantia polymorpha*  
382 *L.* *Plant Cell Physiol* 57: 325-338.

- 383 Hisanaga, T., Okahashi, K., Yamaoka, S., Kajiwara, T., Nishihama, R., Shimamura, M., et al.  
384 (2019a) A cis-acting bidirectional transcription switch controls sexual dimorphism in the  
385 liverwort. *The EMBO journal* 38: e100240.
- 386 Hisanaga, T., Yamaoka, S., Kawashima, T., Higo, A., Nakajima, K., Araki, T., et al. (2019b)  
387 Building new insights in plant gametogenesis from an evolutionary perspective. *Nature*  
388 *Plants* 5: 663-669.
- 389 Inoue, K., Nishihama, R., Araki, T. and Kohchi, T. (2019) Reproductive Induction is a Far-Red  
390 High Irradiance Response that is Mediated by Phytochrome and PHYTOCHROME  
391 INTERACTING FACTOR in *Marchantia polymorpha*. *Plant and Cell Physiology* 60: 1136-  
392 1145.
- 393 Ishizaki, K., Nishihama, R., Ueda, M., Inoue, K., Ishida, S., Nishimura, Y., et al. (2015)  
394 Development of Gateway binary vector series with four different selection markers for the  
395 liverwort *Marchantia polymorpha*. *PLoS One* 10: e0138876.
- 396 Ishizaki, K., Nishihama, R., Yamato, K.T. and Kohchi, T. (2016) Molecular Genetic Tools and  
397 Techniques for *Marchantia polymorpha* Research. *Plant Cell Physiol* 57: 262-270.
- 398 Iwasaki, M., Kajiwara, T., Yasui, Y., Yoshitake, Y., Miyazaki, M., Kawamura, S., et al. (2021)  
399 Identification of the sex-determining factor in the liverwort *Marchantia polymorpha* reveals  
400 unique evolution of sex chromosomes in a haploid system. *Current Biology* 31: 5522-  
401 5532.e5527.
- 402 Kasahara, R.D., Portereiko, M.F., Sandaklie-Nikolova, L., Rabiger, D.S. and Drews, G.N. (2005)  
403 MYB98 is required for pollen tube guidance and synergid cell differentiation in *Arabidopsis*.  
404 *Plant Cell* 17: 2981-2992.
- 405 Kohchi, T., Yamato, K.T., Ishizaki, K., Yamaoka, S. and Nishihama, R. (2021) Development and  
406 Molecular Genetics of *Marchantia polymorpha*. *Annual review of plant biology* 72: 677-702.

- 407 Kurihara, D., Mizuta, Y., Sato, Y. and Higashiyama, T. (2015) ClearSee: a rapid optical clearing  
408 reagent for whole-plant fluorescence imaging. *Development* 142: 4168-4179.
- 409 Lanfear, R. (2018) Do plants have a segregated germline? *PLOS Biology* 16: e2005439.
- 410 McPherson, F.J. and Chenoweth, P.J. (2012) Mammalian sexual dimorphism. *Animal*  
411 *Reproduction Science* 131: 109-122.
- 412 Olmedo-Monfil, V., Durán-Figueroa, N., Arteaga-Vázquez, M., Demesa-Arévalo, E., Autran, D.,  
413 Grimanelli, D., et al. (2010) Control of female gamete formation by a small RNA pathway  
414 in *Arabidopsis*. *Nature* 464: 628-632.
- 415 Rabiger, D.S. and Drews, G.N. (2013) MYB64 and MYB119 are required for cellularization and  
416 differentiation during female gametogenesis in *Arabidopsis thaliana*. *PLoS Genet* 9:  
417 e1003783.
- 418 Sakamoto, Y., Ishimoto, A., Sakai, Y., Sato, M., Nishihama, R., Abe, K., et al. (2022) Improved  
419 clearing method contributes to deep imaging of plant organs. *Communications Biology* 5: 12.
- 420 Schmidt, A., Schmid, M.W. and Grossniklaus, U. (2015) Plant germline formation: common  
421 concepts and developmental flexibility in sexual and asexual reproduction. *Development*  
422 142: 229-241.
- 423 Shimamura, M. (2016) *Marchantia polymorpha*: taxonomy, phylogeny and morphology of a  
424 model system. *Plant Cell Physiol* 57: 230-256.
- 425 Strauss, S., Runions, A., Lane, B., Eschweiler, D., Bajpai, N., Trozzi, N., et al. (2022) Using  
426 positional information to provide context for biological image analysis with MorphoGraphX  
427 2.0. *eLife* 11: e72601.
- 428 Tidy, A.C., Ferjentsikova, I., Vizcay-Barrena, G., Liu, B., Yin, W., Higgins, J.D., et al. (2022)  
429 Sporophytic control of pollen meiotic progression is mediated by tapetum expression of  
430 ABORTED MICROSPORES. *Journal of Experimental Botany* 73: 5543-5558.

- 431 Tsuboyama, S., Nonaka, S., Ezura, H. and Kodama, Y. (2018) Improved G-AgarTrap: A highly  
432 efficient transformation method for intact gemmalings of the liverwort *Marchantia*  
433 *polymorpha*. *Scientific Reports* 8: 10800.
- 434 Vijayan, A., Tofanelli, R., Strauss, S., Cerrone, L., Wolny, A., Strohmeier, J., et al. (2021) A digital  
435 3D reference atlas reveals cellular growth patterns shaping the Arabidopsis ovule. *eLife* 10:  
436 e63262.
- 437 Yamaoka, S., Nishihama, R., Yoshitake, Y., Ishida, S., Inoue, K., Saito, M., et al. (2018)  
438 Generative cell specification requires transcription factors evolutionarily conserved in land  
439 plants. *Curr Biol* 28: 479-486.e475.
- 440 Yamato, K.T., Ishizaki, K., Fujisawa, M., Okada, S., Nakayama, S., Fujishita, M., et al. (2007)  
441 Gene organization of the liverwort Y chromosome reveals distinct sex chromosome  
442 evolution in a haploid system. *Proc Natl Acad Sci U S A* 104: 6472-6477.
- 443 Zhang, Y., Werling, U. and Edelman, W. (2012) SLiCE: a novel bacterial cell extract-based DNA  
444 cloning method. *Nucleic acids research* 40: e55-e55.
- 445 Zhao, H., Lu, M., Singh, R. and Snell, W.J. (2001) Ectopic expression of a Chlamydomonas mt<sup>+</sup>-  
446 specific homeodomain protein in mt<sup>-</sup> gametes initiates zygote development without gamete  
447 fusion. *Genes & development* 15: 2767-2777.
- 448 Zhao, X.A., Bramsiepe, J., Van Durme, M., Komaki, S., Prusicki, M.A., Maruyama, D., et al.  
449 (2017) RETINOBLASTOMA RELATED1 mediates germline entry in Arabidopsis. *Science*  
450 356: eaaf6532.
- 451
- 452
- 453

454 **Legend to figures**

455

456 **Figure 1. Morphologies of mature antheridiophore and archegoniophore of *M. polymorpha***

457 **(A, B)** Top view of antheridiophore (A) and archegoniophore (B). White and yellow arrows  
458 indicate lobes (A) and finger-like rays, respectively.

459 **(C, D)** Cross sections of antheridiophore (C) and archegoniophore (D). White arrowheads indicate  
460 antheridia (C) and archegonia (D), respectively. Inset in (D) is a magnification of the boxed area.

461 **(E, F)** Schematic drawings of an antheridiophore (E) and an archegoniophore (F). Note that the  
462 size of antheridia and archegonia are not to the real scale. Blue arrows indicate the direction of  
463 progression of gametangium maturation.

464 Scale bar, 5 mm (A, B); 1 mm (C, D); 500  $\mu$ m, inset in (D).

465

466 **Figure 2. Outline of the 3D morphological analysis of gametangiophore primordia**  
467 **performed in this study**

468 **(A)** A representative picture of an archegoniophore primordium developing in the apical notch  
469 region (arrow).

470 **(B)** A representative confocal section showing the R2200-stained cell wall pattern of an  
471 archegoniophore primordium.

472 **(C)** Color scheme of germline cells leading to the archegonium (top) and the antheridium (bottom).  
473 Germline lineage was identified based on the expression of the *MpBNB-Citrine* reporter in early  
474 stages (pink) and on their characteristic morphologies in later stages (purple).

475 **(D-H)** Outline of the 3D segmentation. Z-stack images were used to reconstruct 3D images (D),  
476 which were then used for the 3D-cell segmentation by MorphoGraph X (E). Germline precursors  
477 defined by the scheme shown in (C) were annotated on the segmented image (F). (G) and (H)

478 are magnified images of the boxed region in (F). Original fluorescent image of *MpBNB-Citrine*  
479 (G, cyan) and color-annotated image (H, pink) are shown.  
480 Scale bar, 500  $\mu\text{m}$  (A); 100  $\mu\text{m}$  (B-F); and 5  $\mu\text{m}$  (G, H).

481

482 **Figure 3. Specification of MpBNB-expressing germline precursors in the apical notch region**  
483 **after the induction of reproductive growth by FR**

484 In both males (A) and females (B), MpBNB-expressing germline precursors emerge on the  
485 convex protrusion of incipient gametangiophore primordia (arrowheads). In males, multiple  
486 germline precursors emerge (A), whereas in females, only one germline precursor emerges. For  
487 better visualization, 2x enhanced images (equal enhancement for all RGB channels in the entire  
488 image area) of the original ones (left) are shown in the second column.

489 Scale bar, 50  $\mu\text{m}$ .

490

491 **Figure 4. Morphogenesis and germline positioning during the antheridiophore development**

492 Front views (A), side views (B) and bottom views (C) are shown for the primordia of different  
493 stages (1a-1d). Germline cells of early and late stages are colored pink and purple, respectively,  
494 according to Fig. 2E. White arrows in (A) indicate incipient lobes. Primordia of stages 1a, 1b, 1c,  
495 and 1d were taken 2, 3, 4, and 5 days after the onset of FR irradiation, respectively.

496 Scale bar, 100  $\mu\text{m}$ .

497

498 **Figure 5. Morphogenesis and germline positioning during the archegoniophore**  
499 **development**

500 Front views (A), side views (B) and bottom views (C) are shown for the primordia of different  
501 stages (1a-1e). Germline cells of early and late stages are colored pink and purple, respectively,

502 according to Fig. 2E. White arrows in (A) indicate indentations. Primordia of stages 1a, 1b, 1c,  
503 and 1d were taken 3, 4, 6, and 7 days after the onset of FR irradiation, respectively.

504 Scale bar, 100  $\mu\text{m}$ .

505

506 **Figure 6. Cell volume distribution patterns and germline cell numbers of gametangiophore**  
507 **primordia**

508 **(A-F)** 3D morphologies of antheridiophore (A-C) and archegoniophore (D-F) primordia and  
509 their cell size distribution patterns (A, B, D, E). Front views (A, B, D, E) and bottom views (C,  
510 F) are shown. White arrows in (F) indicate indentations. In (A) and (D), germline cells are colored  
511 pink and purple, respectively, according to Fig. 2E.

512 **(G)** Number of germline cells in the primordia of different stages.  $n=3, 3, 13, 13$  for the stage 1a,  
513 1b, 1c, and 1d female primordia, respectively, and 7, 8, 5, 4 for the stage 1a, 1b, 1c, and 1d male  
514 primordia, respectively

515 Scale bar, 100  $\mu\text{m}$ .

516

517 **Figure 7. Development of sex-specific gametangiophore morphologies**

518 Bottom views (A, B) and a side view (C) of 3D-reconstructed antheridiophore (A) and  
519 archegoniophore (B, C) primordia in the stage where sex-specific receptacle morphologies start  
520 to develop. White arrows in (A) and yellow arrows in (B) and (C) indicate incipient lobes and  
521 incipient finger-like rays, respectively. Germline cells of early and late stages are colored pink  
522 and purple, respectively, according to Fig. 2E.

523 Scale bar, 100  $\mu\text{m}$ .

524

525



526 **Figure 8. Expression pattern of MpFGMYB transcriptional reporter as visualized in the**  
527 **reconstructed 3D morphology of archegoniophore primordia**

528 **(A)** Top views of the apical notch region of a vegetative thallus, indicating the absence of  
529 MpFGMYB expression.

530 **(B, C)** Expression patterns of MpFGMYB reporter in archegoniophore primordia of different  
531 stages. Front views and bottom views are shown for the identical samples for each stage.

532 Scale bar, 100  $\mu$ m

533

534 **Figure 9. Morphogenesis and germline positioning during the development of masculinized**  
535 **gametangiophore primordia of Mpfgmyb**

536 Front views (A), side views (B), and bottom views (C) are shown for the primordia of different  
537 stages (1a-1d). Germline cells of early and late stages are colored pink and purple, respectively,  
538 according to Fig. 2E. Primordia of stages 1a, 1b, 1c and 1d were taken 2, 3, 4 and 5 days after the  
539 onset of FR irradiation, respectively.

540 Scale bar, 100  $\mu$ m.

541

542 **Figure 10. Diagrams illustrating the process of sexual dimorphism development in *M.***  
543 ***polymorpha***

544 After induction of reproductive growth, germline precursors (pink) differentiate on the slightly  
545 convex surface of incipient receptacle primordia in the apical notch region. In this stage little  
546 morphological difference is apparent between male and female receptacles, with both having a  
547 dome-like shape, whereas they show different spatial arrangement in the germline precursors. As  
548 development proceeds, male receptacles (top) become flattened and the antheridium primordia  
549 (purple) develop over the top surface of receptacles, which later acquire the characteristic

550 antheridiophore morphology with peripheral lobes. In females (bottom), archegoniophore  
551 receptacles (bottom) develop archegonium primordia (purple) along the receptacle periphery with  
552 regular spacing. Later, regions between adjacent archegonia clusters extend to develop finger-like  
553 rays to confer the characteristic receptacle morphology. Female plants lacking *MpFGMYB*  
554 precisely follow the male-type developmental processes both in germline precursor placement  
555 and receptacle morphogenesis, indicating a pivotal role of *MpFGMYB* in female sexual  
556 differentiation.

557

558 **Supplementary Figure 1. CRISPR-induced *Mpfgmyb* mutant in the *MpBNB-Citrine***  
559 **knock-in line**

560 Orange, purple, and red boxes in the gene diagram indicate untranslated regions, protein-coding  
561 regions, and Myb domain-coding parts, respectively. Alternative splicing is represented by folded  
562 lines connecting the exons. Underline indicates the gRNA target sequence.

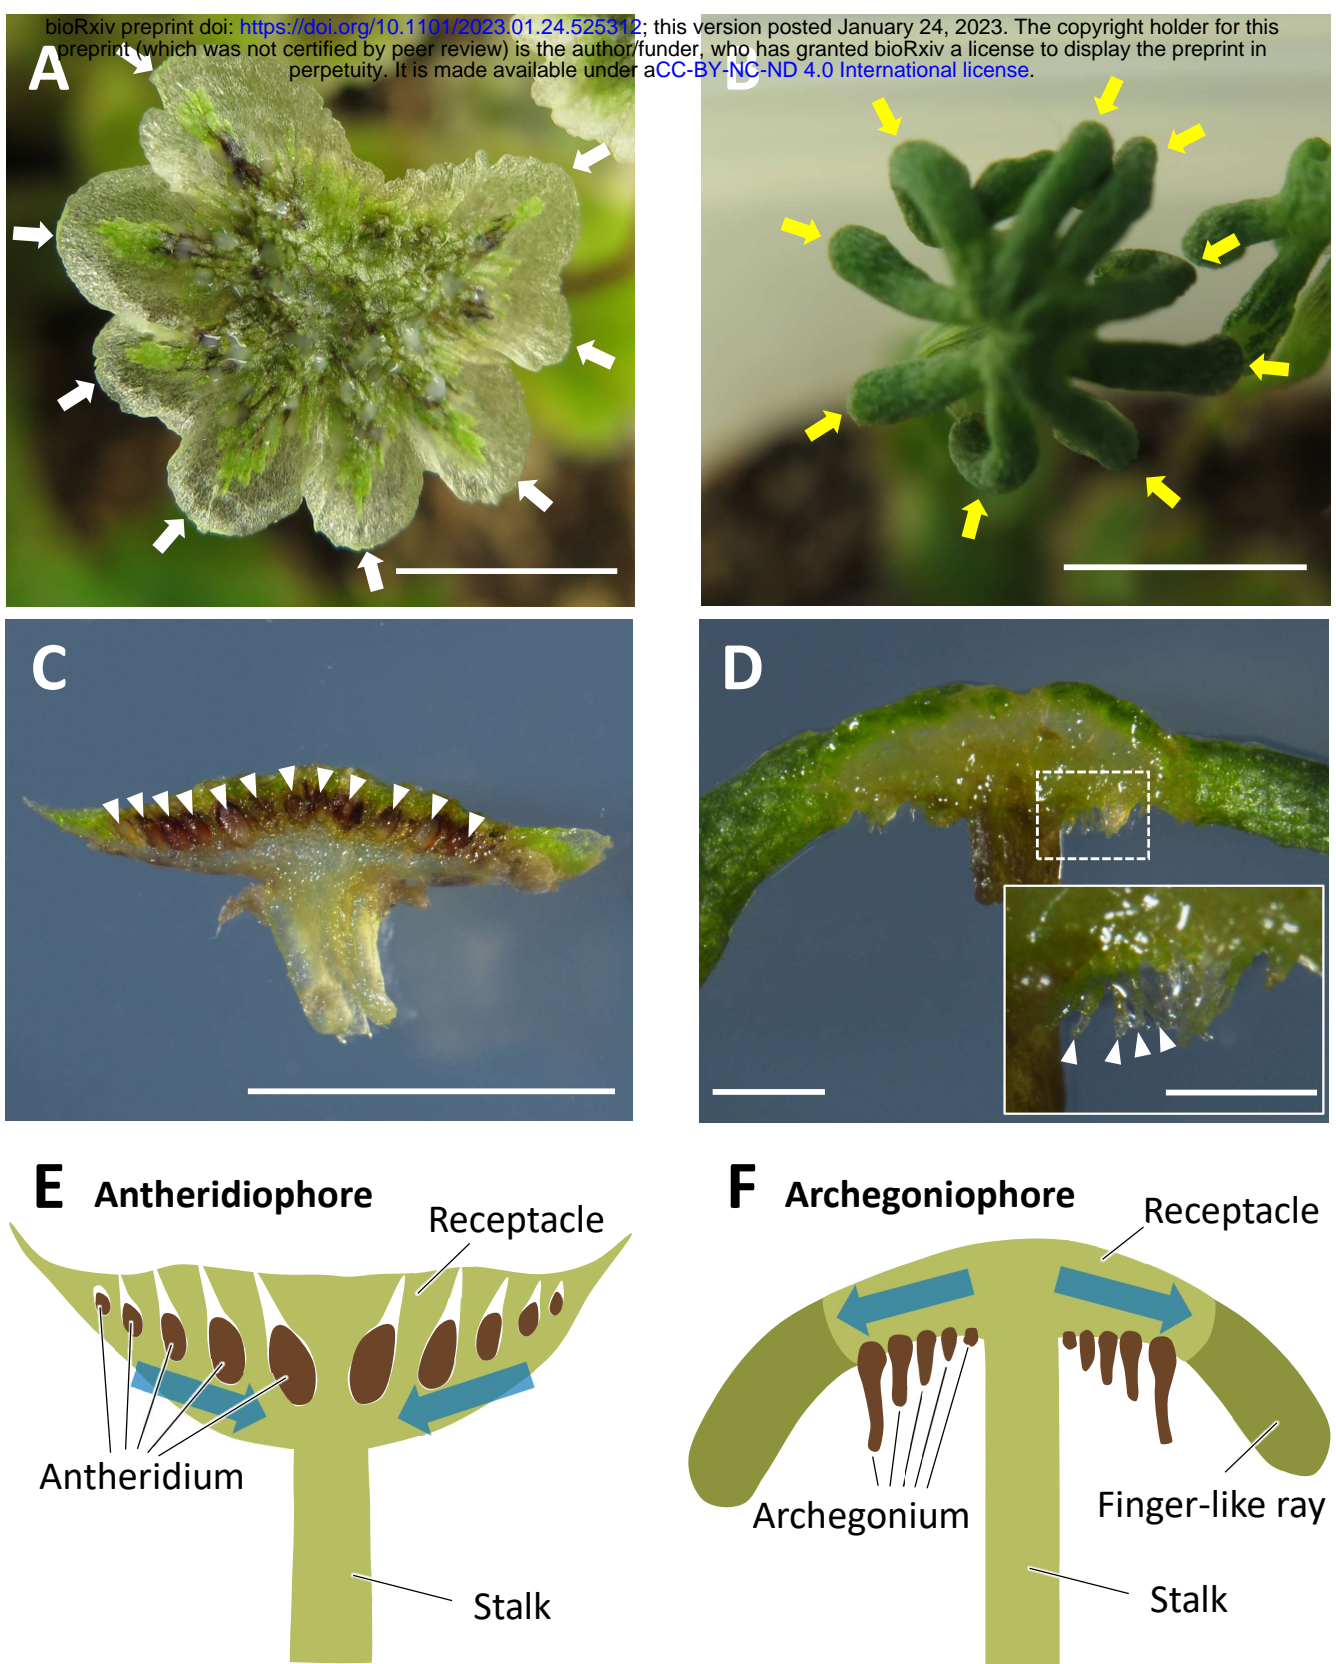

**Figure 1. Morphologies of mature antheridiophore and archegoniophore of *M. polymorpha***

**(A, B)** Top view of antheridiophore (A) and archegoniophore (B). White and yellow arrows indicate lobes (A) and finger-like rays, respectively.

**(C, D)** Cross sections of antheridiophore (C) and archegoniophore (D). White arrowheads indicate antheridia (C) and archegonia (D), respectively. Inset in (D) is a magnification of the boxed area.

**(E, F)** Schematic drawings of an antheridiophore (E) and an archegoniophore (F). Note that the size of antheridia and archegonia are not to the real scale. Blue arrows indicate the direction of progression of gametangium maturation.

Scale bar, 5 mm (A, B); 1 mm (C, D); 500  $\mu$ m, inset in (D).

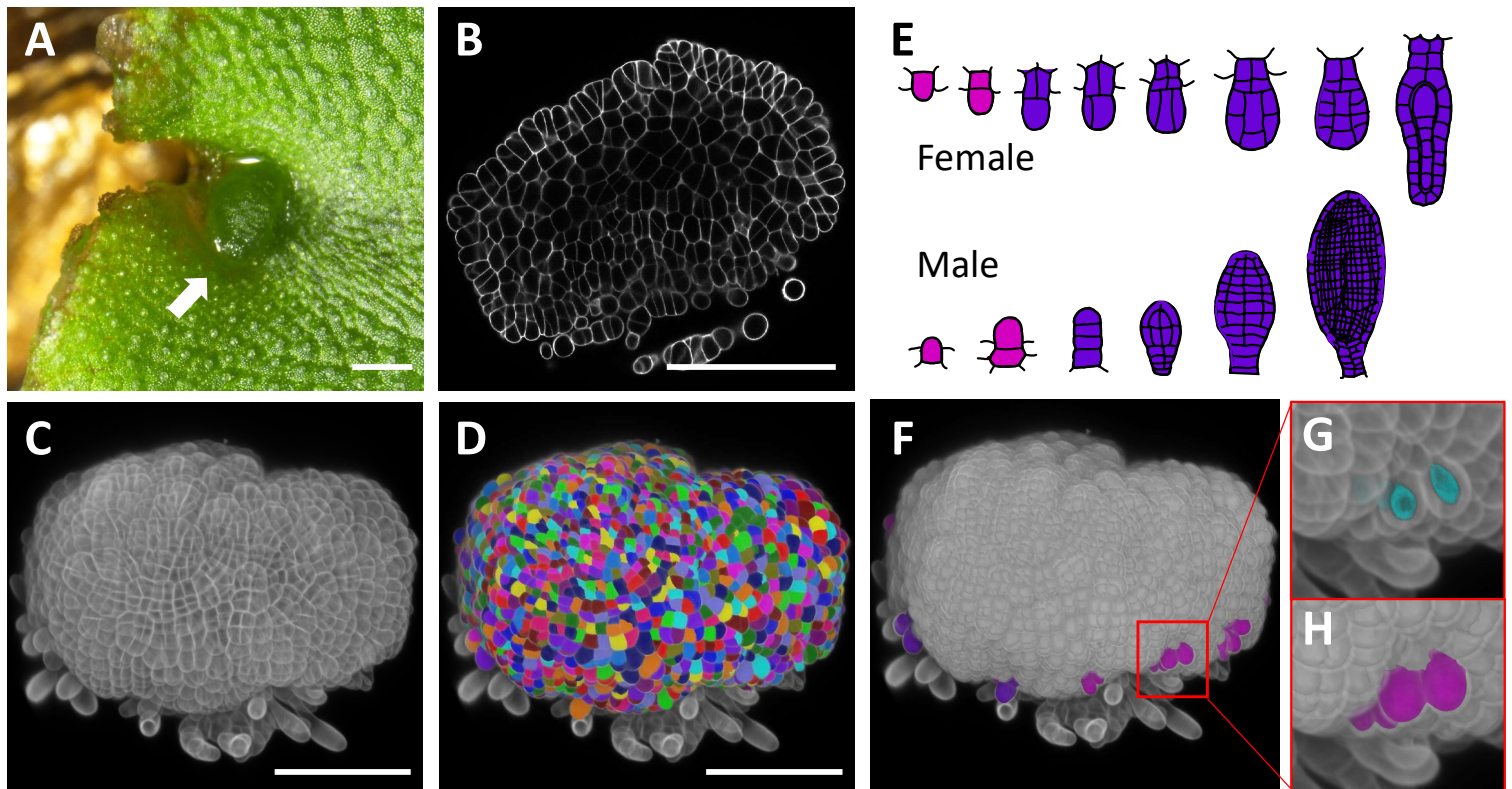

## Figure 2. Outline of the 3D morphological analysis of gametangiophore primordia performed in this study

**(A)** A representative picture of an archegoniophore primordium developing in the apical notch region (arrow).

**(B)** A representative confocal section showing the R2200-stained cell wall pattern of an archegoniophore primordium.

**(C)** Color scheme of germline cells leading to the archegonium (top) and the antheridium (bottom). Germline lineage was identified based on the expression of the *MpBNB-Citrine* reporter in early stages (pink) and on their characteristic morphologies in later stages (purple).

**(D-H)** Outline of the 3D segmentation. Z-stack images were used to reconstruct 3D images (D), which were then used for the 3D-cell segmentation by MorphoGraph X (E). Germline precursors defined by the scheme shown in (C) were annotated on the segmented image (F). (G) and (H) are magnified images of the boxed region in (F). Original fluorescent image of *MpBNB-Citrine* (G, cyan) and color-annotated image (H, pink) are shown.

Scale bar, 500  $\mu\text{m}$  (A); 100  $\mu\text{m}$  (B-F); and 5  $\mu\text{m}$  (G, H).

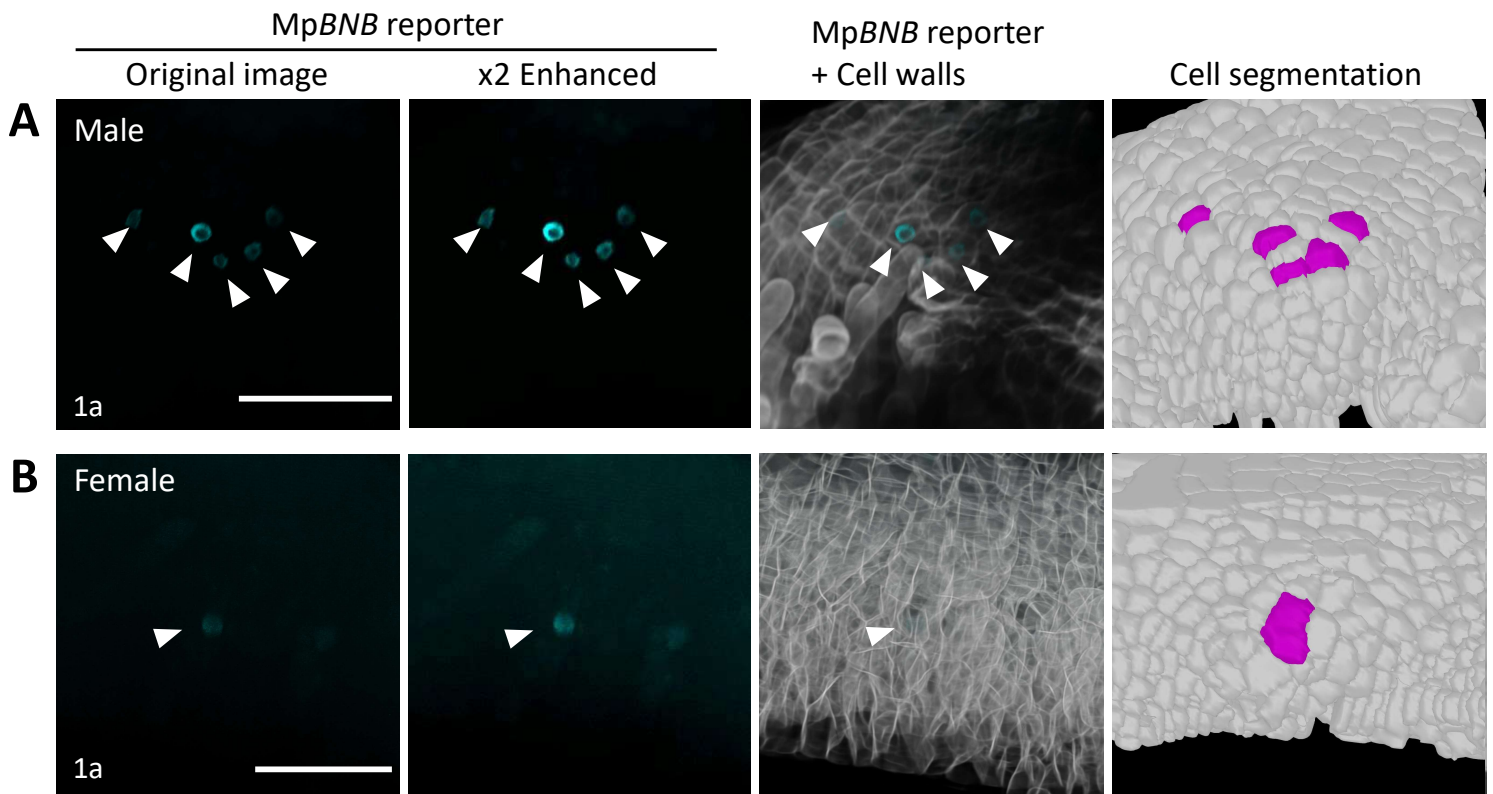

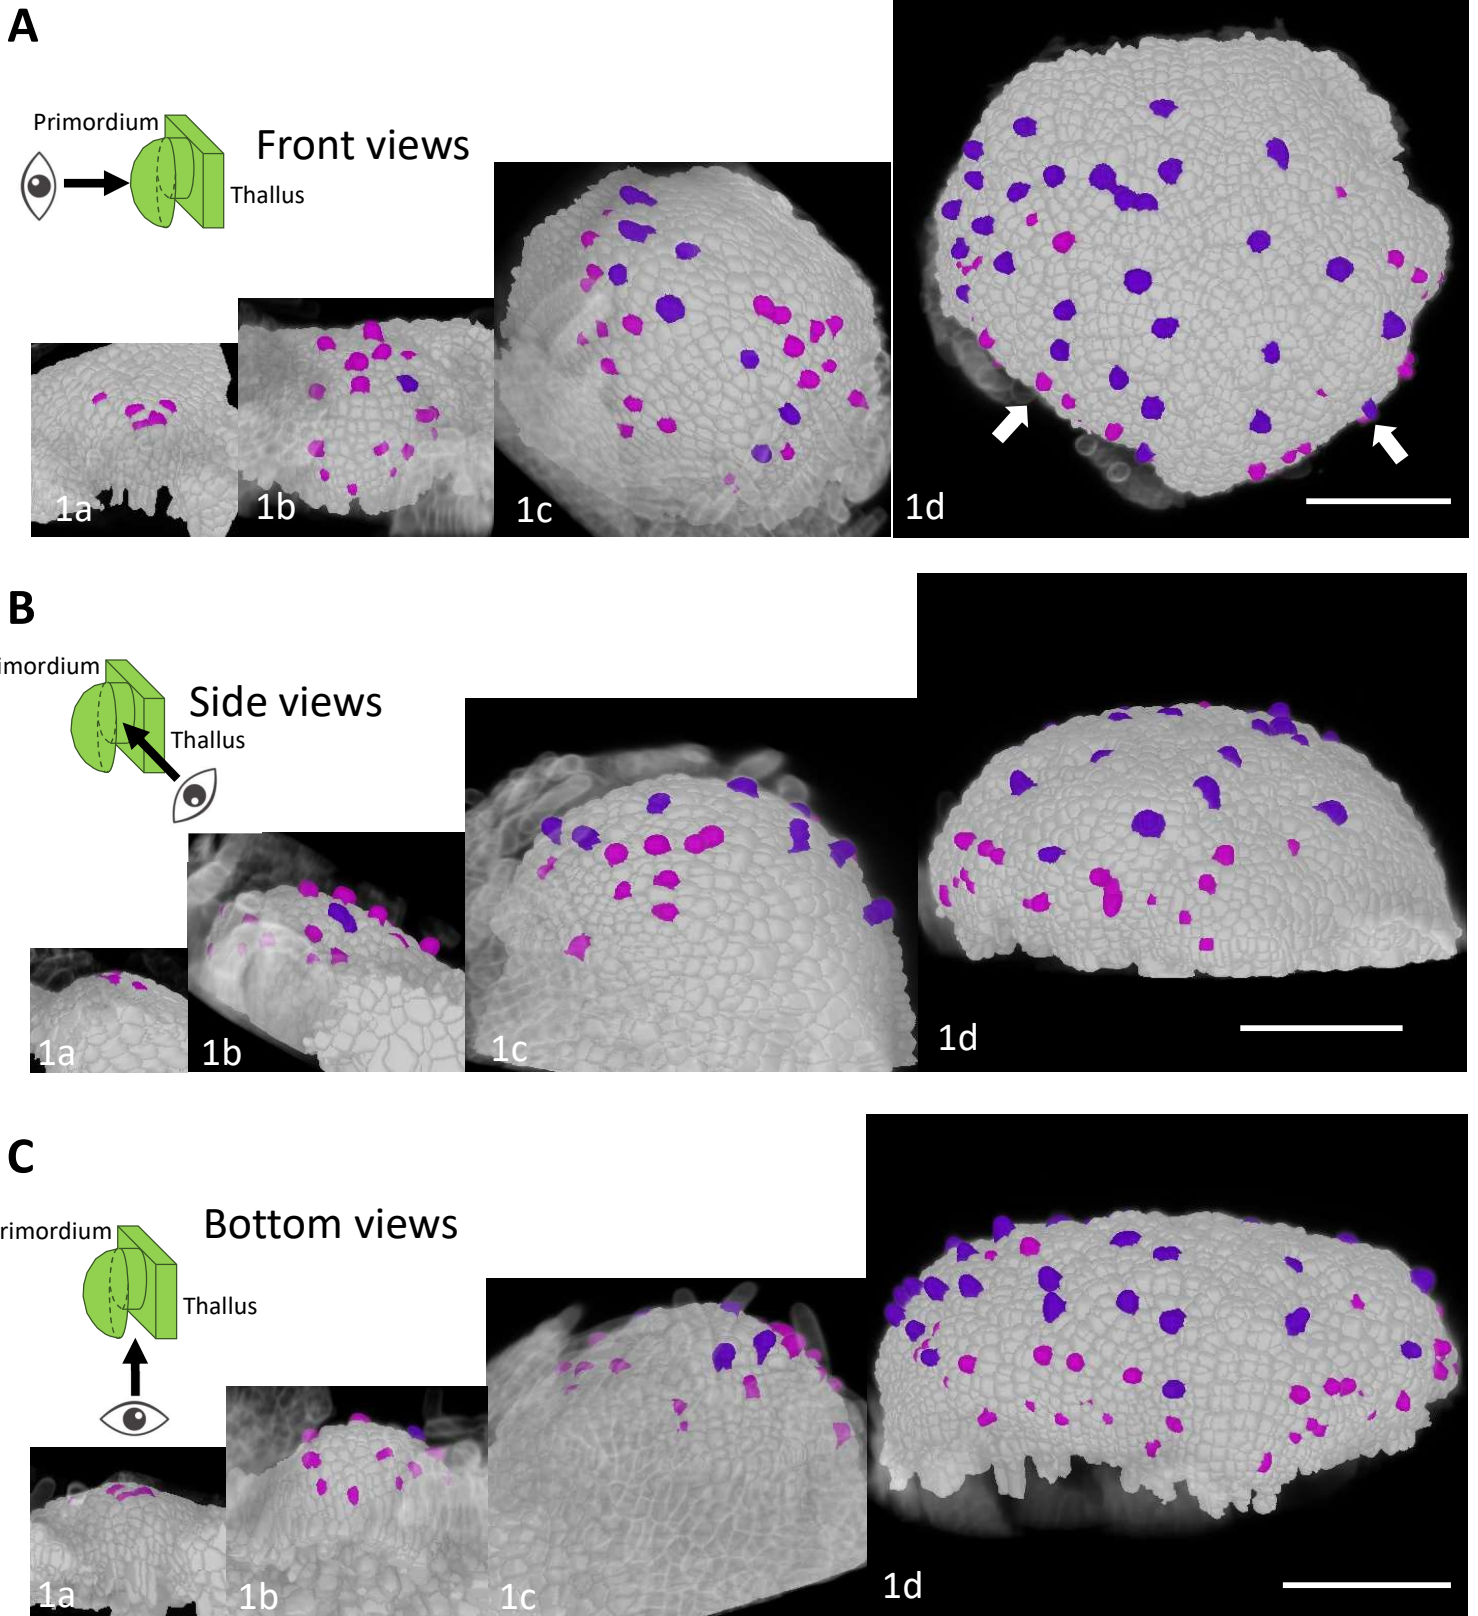

### Figure 4. Morphogenesis and germline positioning during the antheridiophore development

Front views (A), side views (B) and bottom views (C) are shown for the primordia of different stages (1a-1d). Germline cells of early and late stages are colored pink and purple, respectively, according to Fig. 2E. White arrows in (A) indicate incipient lobes. Primordia of stages 1a, 1b, 1c, and 1d were taken 2, 3, 4, and 5 days after the onset of FR irradiation, respectively.

Scale bar, 100  $\mu$ m.

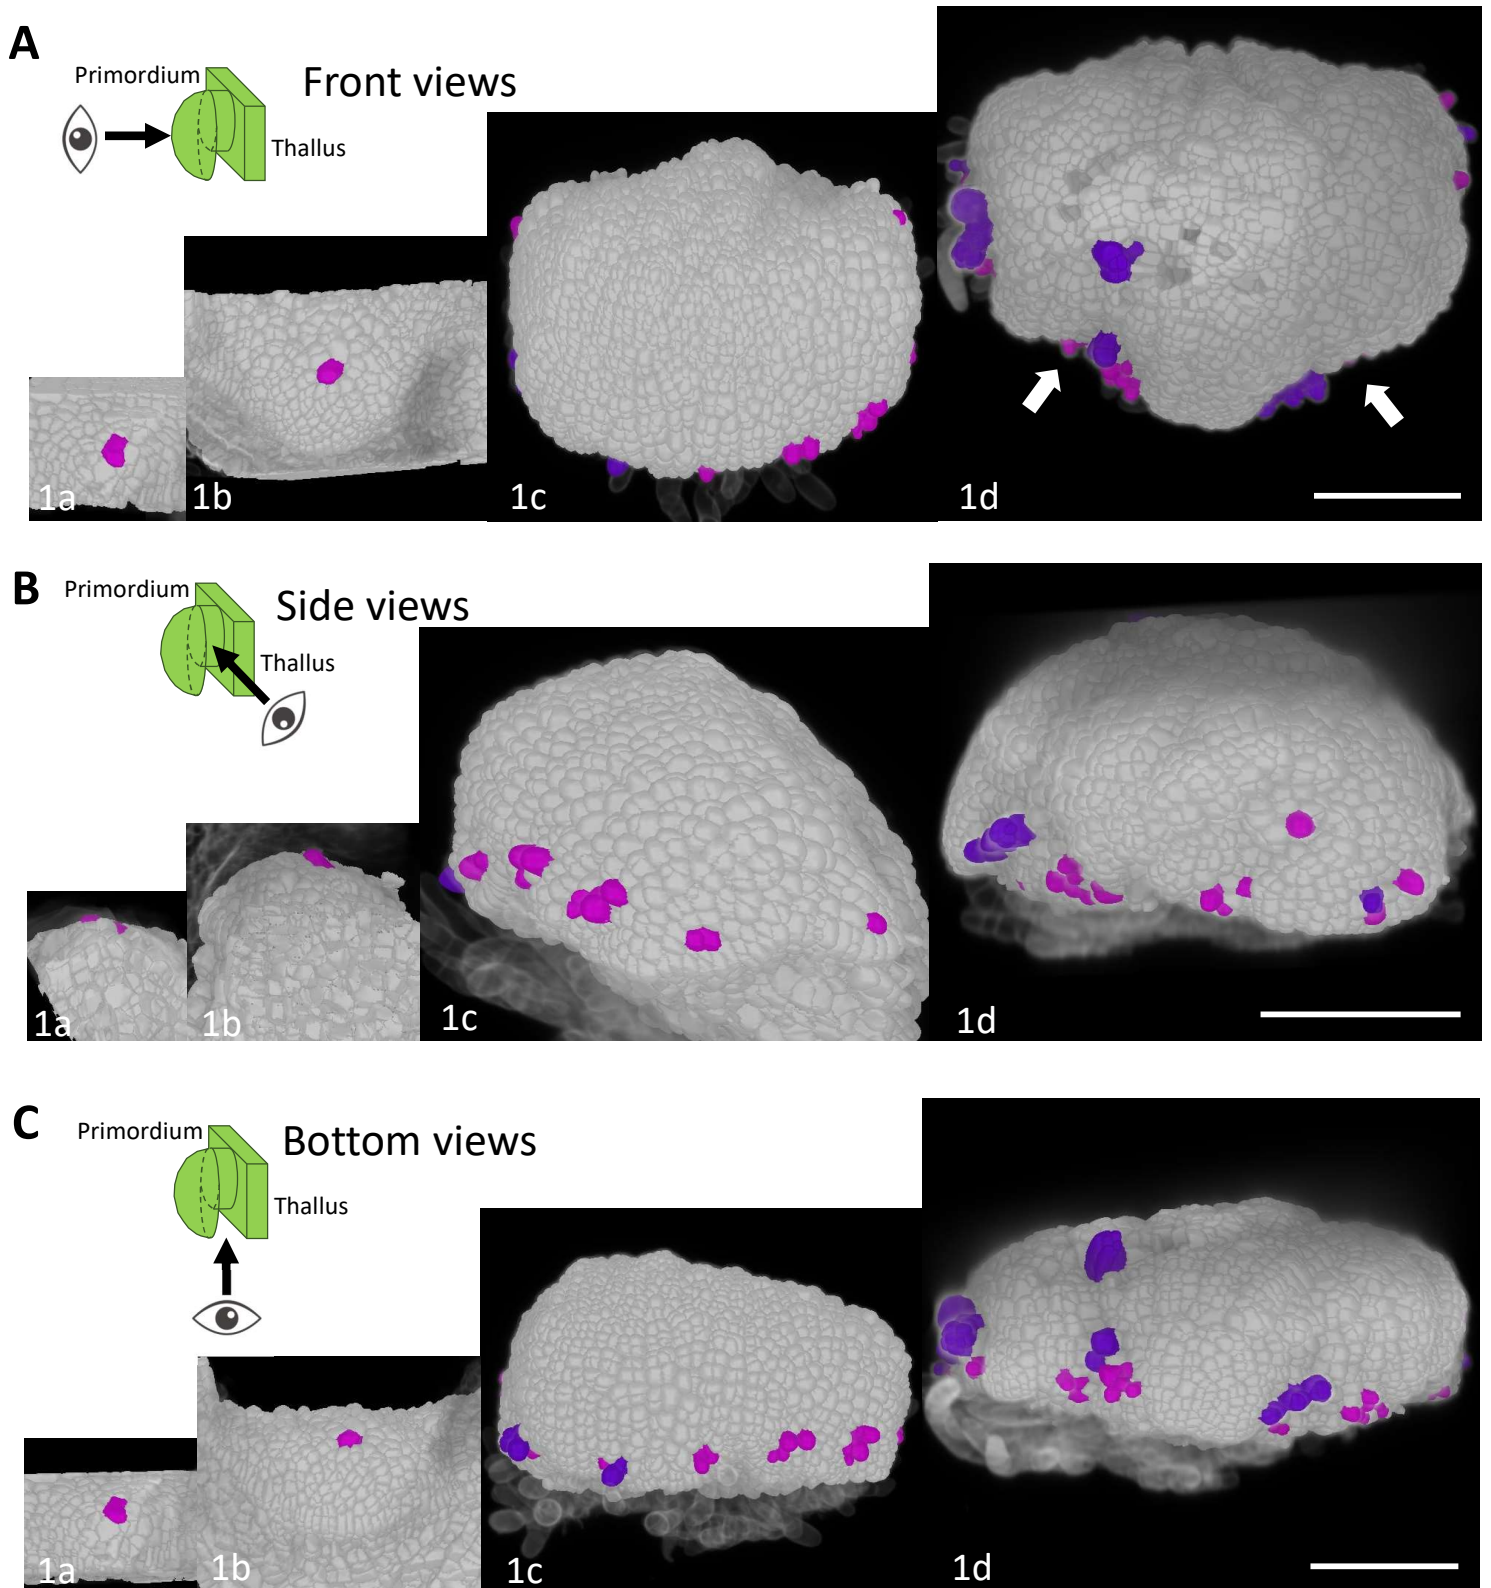

### Figure 5. Morphogenesis and germline positioning during the archegoniophore development

Front views (A), side views (B) and bottom views (C) are shown for the primordia of different stages (1a-1e). Germline cells of early and late stages are colored pink and purple, respectively, according to Fig. 2E. White arrows in (A) indicate indentations. Primordia of stages 1a, 1b, 1c, and 1d were taken 3, 4, 6, and 7 days after the onset of FR irradiation, respectively.

Scale bar, 100  $\mu\text{m}$ .

## Male

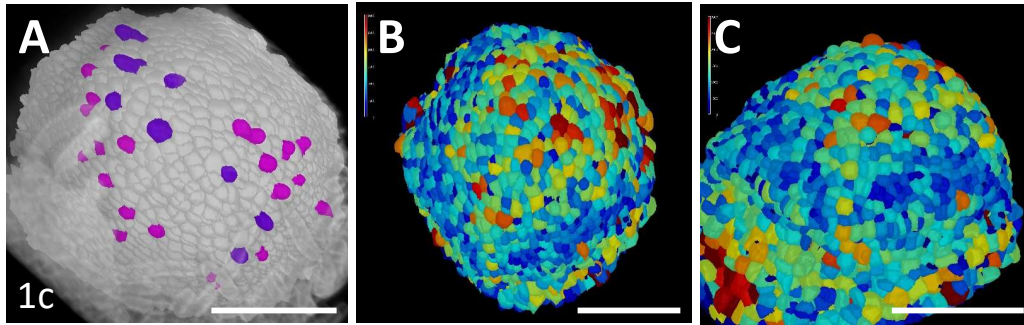

## Female

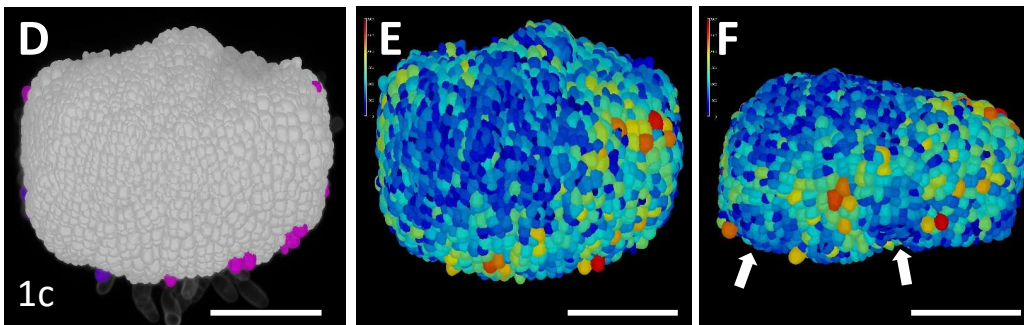

## G

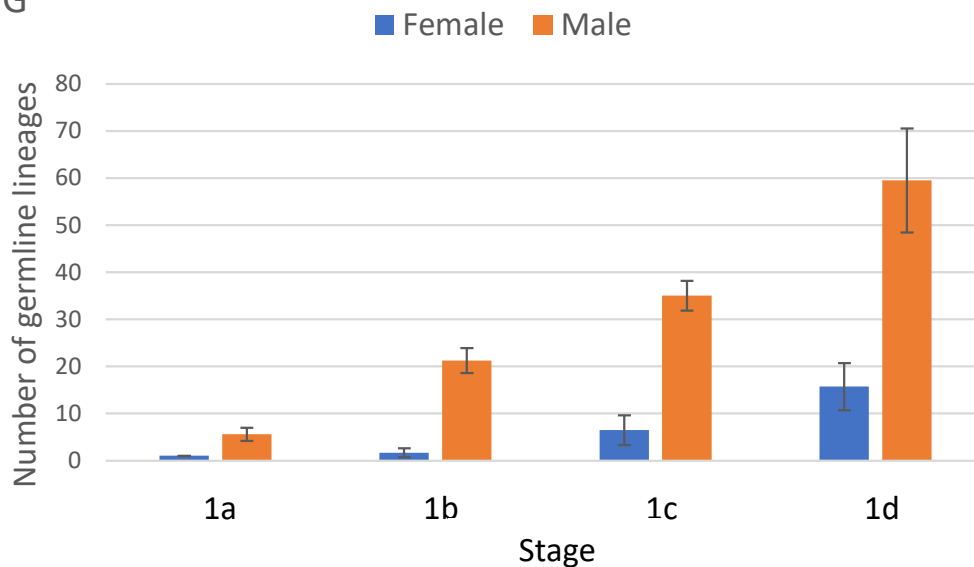

### Figure 6. Cell volume distribution patterns and germline cell numbers of gametangiophore primordia

(A-F) 3D morphologies of antheridiophore (A-C) and archegoniophore (D-F) primordia and their cell size distribution patterns (A, B, D, E). Front views (A, B, D, E) and bottom views (C, F) are shown. White arrows in (F) indicate indentations. In (A) and (D), germline cells are colored pink and purple, respectively, according to Fig. 2E.

(G) Number of germline cells in the primordia of different stages.  $n=3, 3, 13, 13$  for the stage 1a, 1b, 1c, and 1d female primordia, respectively, and 7, 8, 5, 4 for the stage 1a, 1b, 1c, and 1d male primordia, respectively

Scale bar, 100  $\mu\text{m}$ .



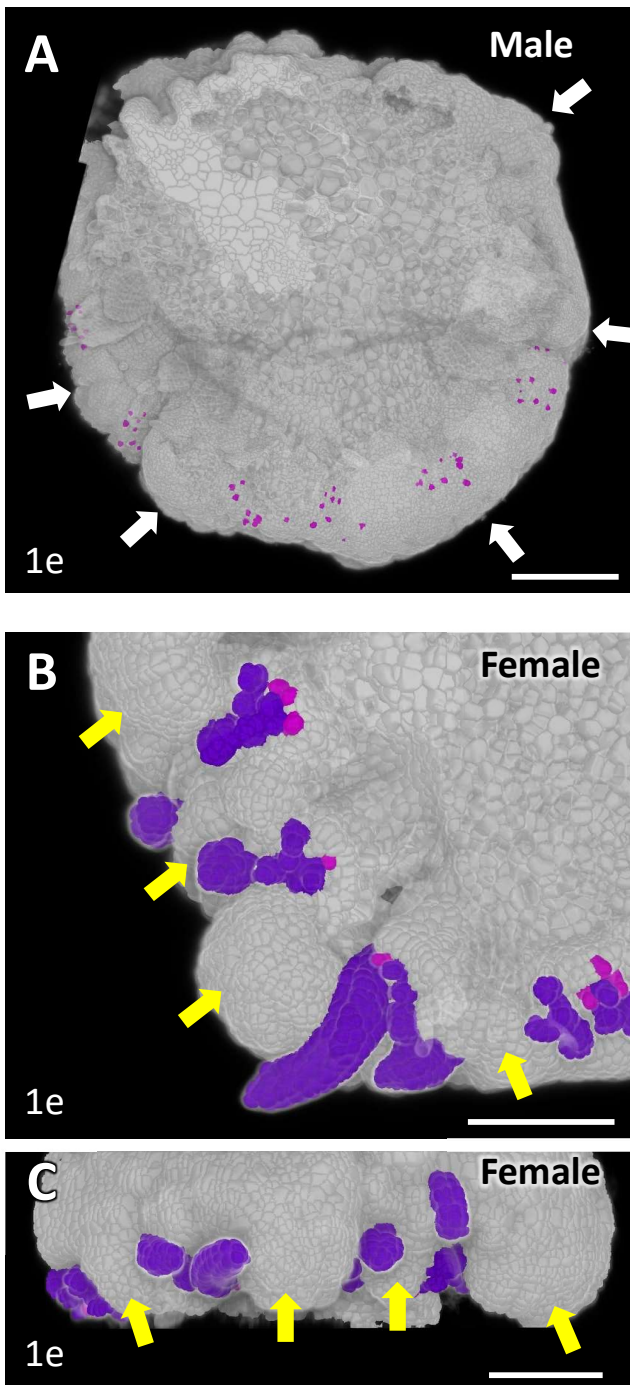

### Figure 7. Development of sex-specific gametangiophore morphologies

Bottom views (A, B) and a side view (C) of 3D-reconstructed antheridiophore (A) and archegoniophore (B, C) primordia in the stage where sex-specific receptacle morphologies start to develop. White arrows in (A) and yellow arrows in (B) and (C) indicate incipient lobes and incipient finger-like rays, respectively. Germline cells of early and late stages are colored pink and purple, respectively, according to Fig. 2E. Scale bar, 100  $\mu$ m.

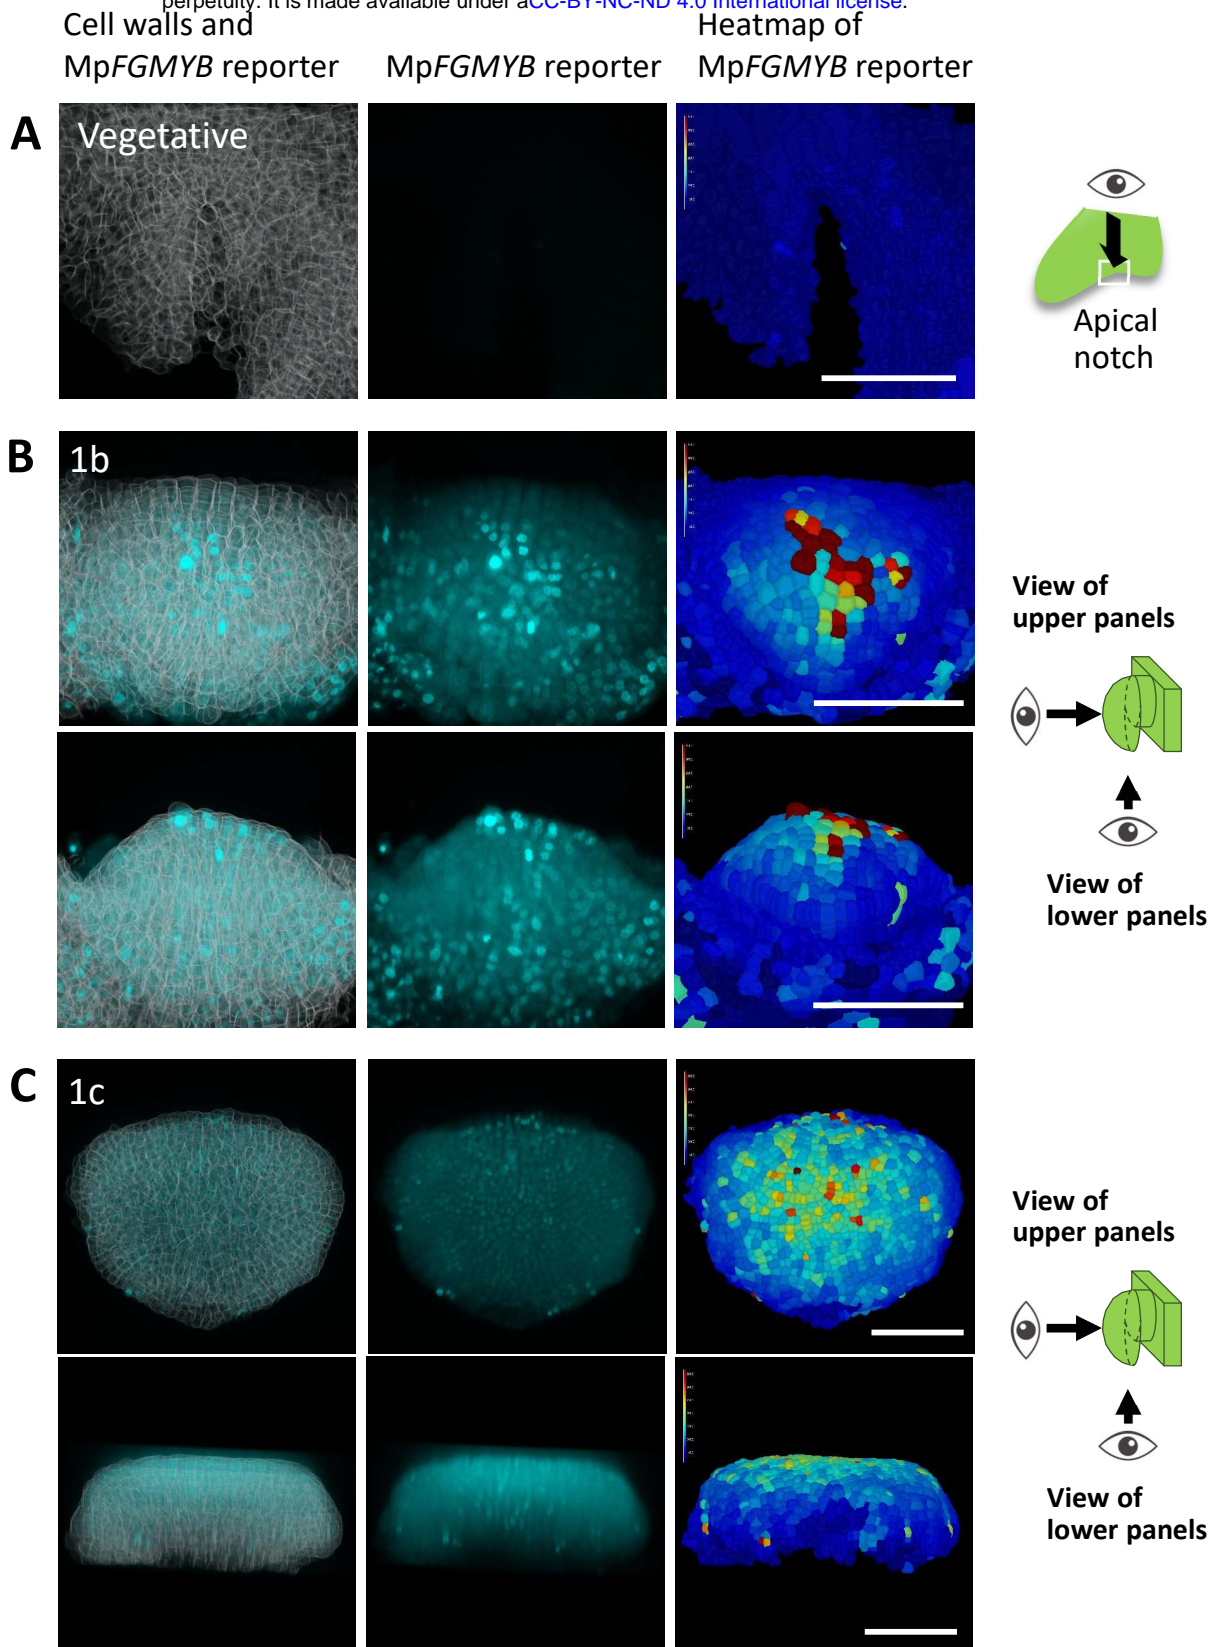

**Figure 8. Expression pattern of *MpFGMYB* transcriptional reporter as visualized in the reconstructed 3D morphology of archegoniophore primordia**

**(A)** Top views of the apical notch region of a vegetative thallus, indicating the absence of *MpFGMYB* expression.

**(B, C)** Expression patterns of *MpFGMYB* reporter in archegoniophore primordia of different stages. Front views and bottom views are shown for the identical samples for each stage.

Scale bar, 100  $\mu\text{m}$

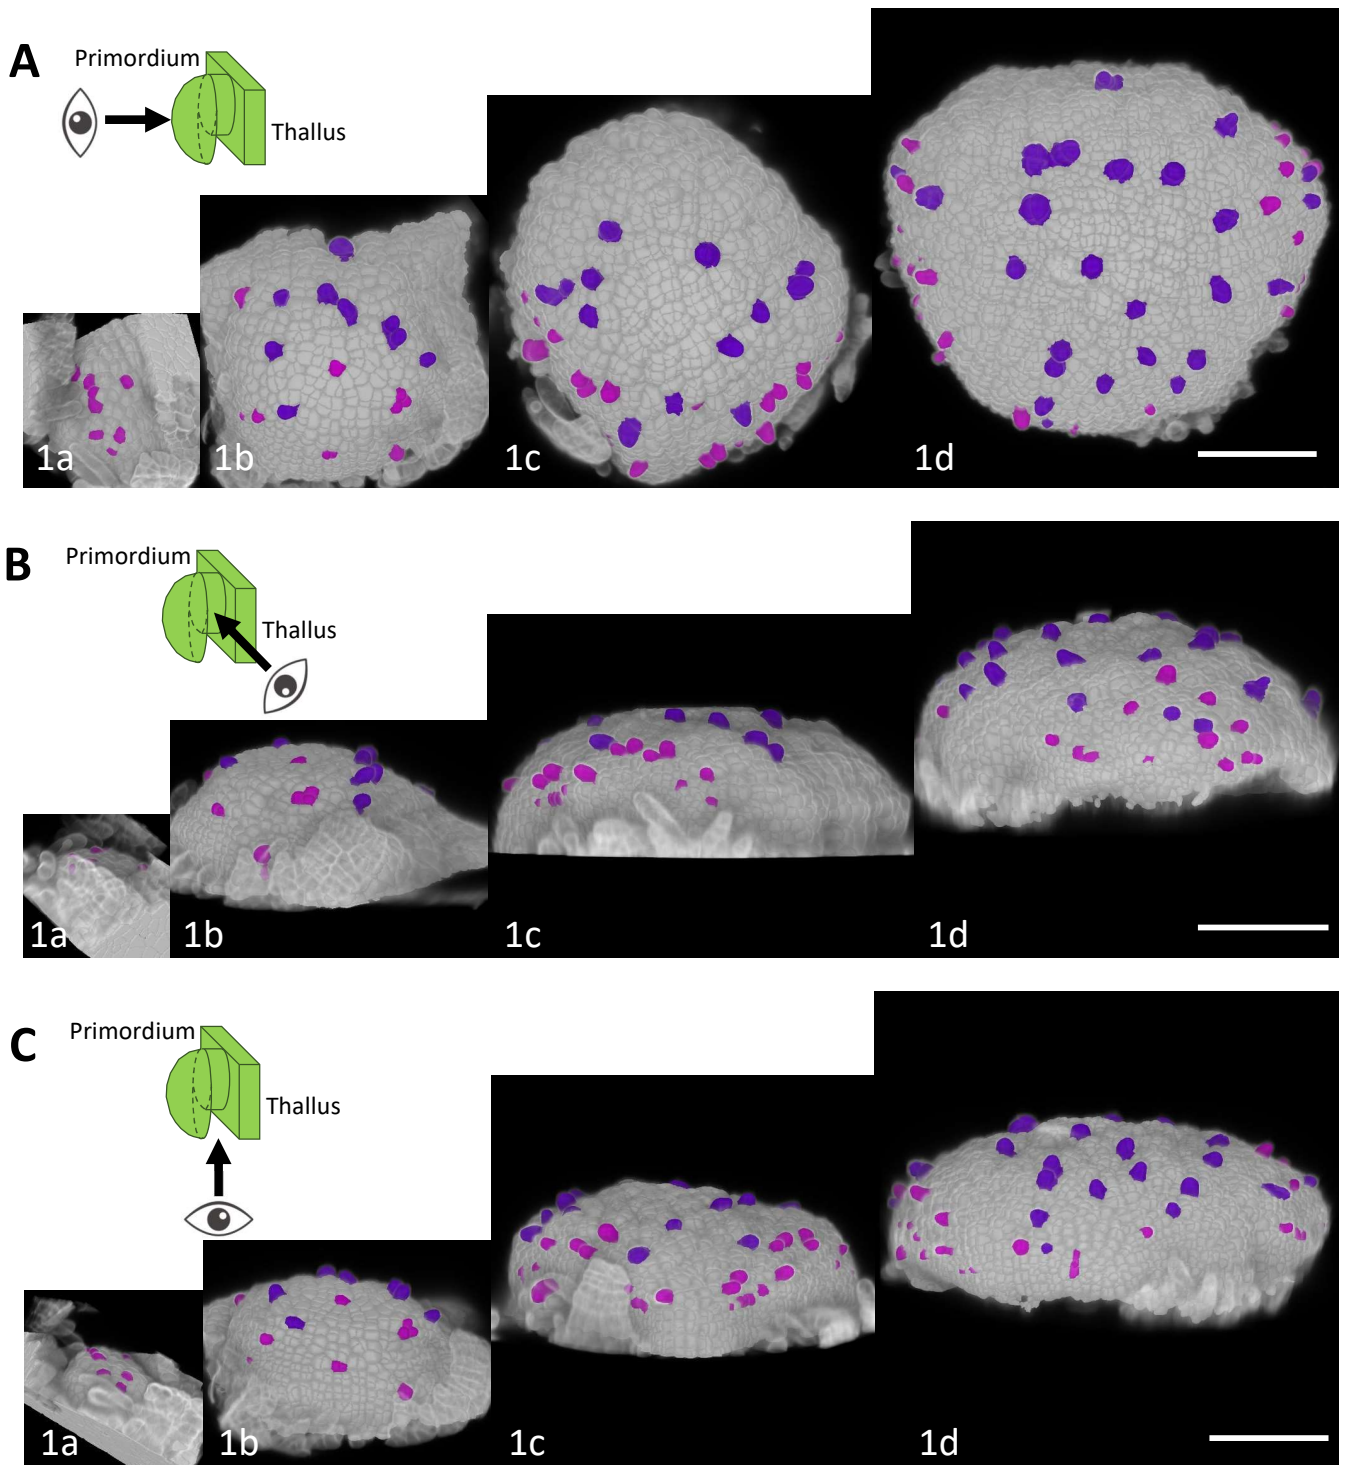

**Figure 9. Morphogenesis and germline positioning during the development of masculinized gametangiophore primordia of *Mpfgyb***

Front views (A), side views (B), and bottom views (C) are shown for the primordia of different stages (1a-1d). Germline cells of early and late stages are colored pink and purple, respectively, according to Fig. 2E. Primordia of stages 1a, 1b, 1c and 1d were taken 2, 3, 4 and 5 days after the onset of FR irradiation, respectively. Scale bar, 100  $\mu$ m.

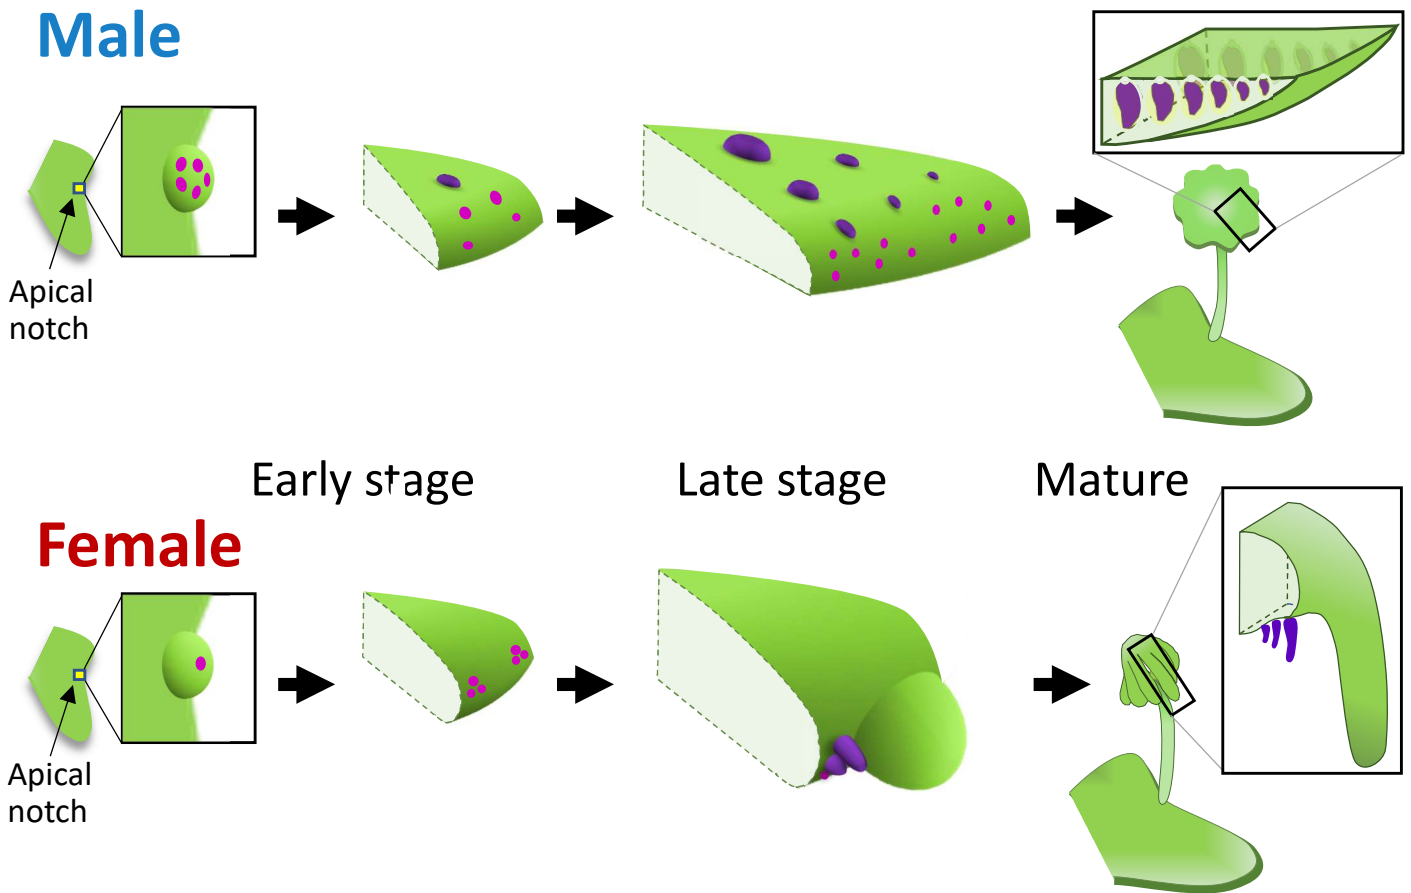

**Figure 10. Diagrams illustrating the process of sexual dimorphism development in *M. polymorpha***

After induction of reproductive growth, germline precursors (pink) differentiate on the slightly convex surface of incipient receptacle primordia in the apical notch region. In this stage little morphological difference is apparent between male and female receptacles, with both having a dome-like shape, whereas they show different spatial arrangement in the germline precursors. As development proceeds, male receptacles (top) become flattened and the antheridium primordia (purple) develop over the top surface of receptacles, which later acquire the characteristic antheridiophore morphology with peripheral lobes. In females (bottom), archegoniophore receptacles (bottom) develop archegonium primordia (purple) along the receptacle periphery with regular spacing. Later, regions between adjacent archegonia clusters extend to develop finger-like rays to confer the characteristic receptacle morphology. Female plants lacking *MpFGMYB* precisely follow the male-type developmental processes both in germline precursor placement and receptacle morphogenesis, indicating a pivotal role of *MpFGMYB* in female sexual differentiation.

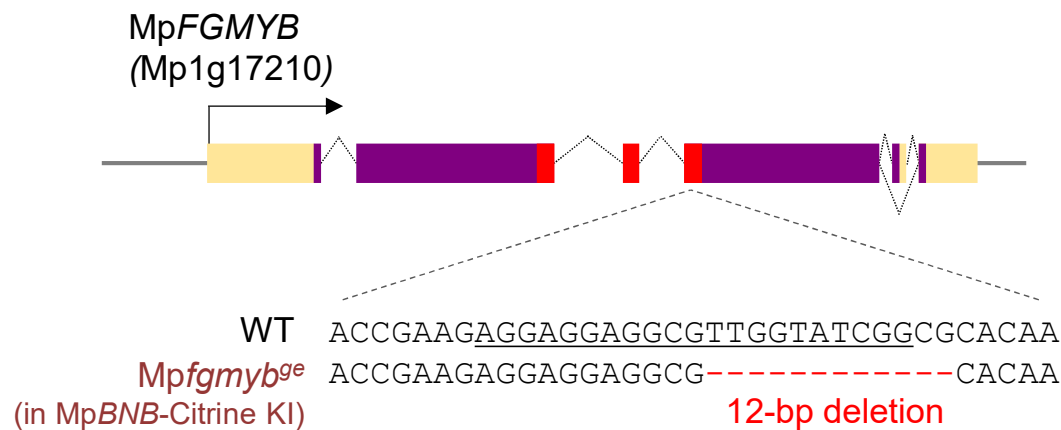

### Supplementary Figure 1. CRIPSR-induced *Mpfgmyb* mutant in the MpBNB-Citrine knock-in line.

Orange, purple, and red boxes in the gene diagram indicate untranslated regions, protein-coding regions, and Myb domain-coding parts, respectively. Alternative splicing is represented by folded lines connecting the exons. Underline indicates the gRNA target sequence.
